# Supplementary material
Source: PubMed Central journal article supplement (PMC7793006)
Supplement: NIHMS1548518-supplement-1.pdf [file NIHMS1548518-supplement-1.pdf]

| Environment                                                            | Age 3 | Age 12 | References                                                                                                                                                                                                                                                                                                                                                                                                                                                                                                                                                                                                                                                                     |
|------------------------------------------------------------------------|-------|--------|--------------------------------------------------------------------------------------------------------------------------------------------------------------------------------------------------------------------------------------------------------------------------------------------------------------------------------------------------------------------------------------------------------------------------------------------------------------------------------------------------------------------------------------------------------------------------------------------------------------------------------------------------------------------------------|
| Dyadic Adjustment Scale, Brief version, Mother                         | X     | X      | Spanier, G. S. (1976). Measuring dyadic adjustment: New scales for assessing the quality of marriage and similar dyads. <i>Journal of Marriage and the Family</i> , 38 15-28./ Sabourin, S., Valois, P., & Lussier, Y. (2005). Development and Validation of a Brief Version of the Dyadic Adjustment Scale With a Nonparametric Item Analysis Model. <i>Psychological Assessment</i> , 17 (1), 15-27.                                                                                                                                                                                                                                                                         |
| Dyadic Adjustment Scale, Brief version, Father                         | X     | X      |                                                                                                                                                                                                                                                                                                                                                                                                                                                                                                                                                                                                                                                                                |
| PAPA life stress, Parent                                               | X     |        | Costello, E. J., Angold, A., March, J., & Fairbank, J. (1998). Life events and post-traumatic stress: the development of a new measure for children and adolescents. <i>Psychological Medicine</i> , 28 (6), 1275-1288.                                                                                                                                                                                                                                                                                                                                                                                                                                                        |
| UCLA Life Events Interview, Child                                      |       | X      | Hammen, C., Davila, J., Brown, G., Ellicott, A., & Gitlin, M. (1992). Psychiatric history and stress: Predictors of severity of unipolar depression. <i>Journal of Abnormal Psychology</i> , 101, 45-52./ Davila, J., Hammen, C., Burge, D., Paley, B., & Daley, S.E. (1995). Poor interpersonal problem solving as a mechanism of stress generation in depression among adolescent women. <i>Journal of Abnormal Psychology</i> , 104, 592-600./ Hammen, C., Adrian, C., Gordon, D., Burge, D., Jaenicke, C., & Hiroto, D. (1987). Children of depressed mothers: Maternal strain and symptom predictors of dysfunction. <i>Journal of Abnormal Psychology</i> , 96, 190-198. |
| UCLA Life Events Interview, Parent (about Child )                      |       | X      |                                                                                                                                                                                                                                                                                                                                                                                                                                                                                                                                                                                                                                                                                |
| McMaster Family Assessment Device general functioning subscale, Mother |       | X      | Miller, I.W., Epstein, N.B., & Bishop, D.S. (1985). The McMaster Family Assessment Device: Reliability and validity. <i>Journal of Marital and Family Therapy</i> , 11, 345-356./ Family Assessment Device                                                                                                                                                                                                                                                                                                                                                                                                                                                                     |
| McMaster Family Assessment Device general functioning subscale, Father |       | X      |                                                                                                                                                                                                                                                                                                                                                                                                                                                                                                                                                                                                                                                                                |

|                                                                                |   |   |                                                                                                                                                                                                                                                                                                                                                                                                                                                                                                                                                                                 |
|--------------------------------------------------------------------------------|---|---|---------------------------------------------------------------------------------------------------------------------------------------------------------------------------------------------------------------------------------------------------------------------------------------------------------------------------------------------------------------------------------------------------------------------------------------------------------------------------------------------------------------------------------------------------------------------------------|
| Perceived Criticism from mother and father, Child<br><b>Social Functioning</b> | X |   | Masland, S. R., & Hooley, J. M. (2015). Perceived criticism: A research update for clinical practitioners. <i>Clinical Psychology: Science and Practice</i> , 22(3), 211-222.                                                                                                                                                                                                                                                                                                                                                                                                   |
| Global Assessment of Functioning, Parent and Child                             | X | X | First, M. B., Gibbon, M., Spitzer, R. L., & Williams, J. B. W. (1996). Structured clinical interview for DSM- IV Axis I disorders: Non-patient edition (SCID-I, Version 2.0)                                                                                                                                                                                                                                                                                                                                                                                                    |
| PAPA impairment, Parent                                                        | X |   | Egger, H. L., Ascher, B. H., & Angold, A. (1999). The Preschool Age Psychiatric Assessment: Version 1.1. Durham, NC: Center for Developmental Epidemiology, Department of Psychiatry and Behavioral Sciences, Duke University Medical Center. / Egger, H. L., Erkanli, A., Keeler, G., Potts, E., Walter, B. K., & Angold, A. (2006). Test-retest reliability of the Preschool Age Psychiatric Assessment (PAPA). <i>Journal of the American Academy of Child &amp; Adolescent Psychiatry</i> , 45, 538-549.                                                                    |
| Vineland Screener, Parent                                                      | X |   | Sparrow, S. S., Carter, A. S., & Cicchetti, D. V. (1993). Vineland Screener: Overview, reliability, validity, administration, and scoring. New Haven, CT: Yale University Child Study Center.                                                                                                                                                                                                                                                                                                                                                                                   |
| Popularity Measure, Teacher                                                    | X |   | Lemerise, E., & Dodge, K. A. (1988). Teacher simulation of peer sociometric status. Unpublished manuscript. Vanderbilt University. Nashville, TN. / Eisenberg, N., Gershoff, E. T., Fabes, R. A., Shepard, S. A., Cumberland, A. J., Losoya, S. H., . . . Murphy, B. C. (2001). Mother's emotional expressivity and children's behavior problems and social competence: Mediation through children's regulation. <i>Developmental Psychology</i> , 37(4), 475-490.                                                                                                              |
| Eisenberg social competence, Parent                                            | X |   | Eisenberg, N., Fabes, R. A., Guthrie, I. K., Murphy, B. C., Maszk, P., Holmgren, R., & Suh, K. (1996). The relations of regulation and emotionality to problem behavior in elementary school children. <i>Development and psychopathology</i> , 8(1), 141-162. / Eisenberg, N., Gershoff, E. T., Fabes, R. A., Shepard, S. A., Cumberland, A. J., Losoya, S. H., . . . Murphy, B. C. (2001). Mother's emotional expressivity and children's behavior problems and social competence: Mediation through children's regulation. <i>Developmental Psychology</i> , 37(4), 475-490. |

|                                                       |   |                                                                                                                                                                                                                                                                                                                                                                                                                                                                         |
|-------------------------------------------------------|---|-------------------------------------------------------------------------------------------------------------------------------------------------------------------------------------------------------------------------------------------------------------------------------------------------------------------------------------------------------------------------------------------------------------------------------------------------------------------------|
| Eisenberg social competence, Teacher                  | X |                                                                                                                                                                                                                                                                                                                                                                                                                                                                         |
| Multidimensional Social Support, Child                | X | Zimet, G. D., Dahlem, N. W., Zimet, S. G., & Farley, G. K. (1988). The multidimensional scale of perceived social support. <i>Journal of personality assessment</i> , 52(1), 30-41.                                                                                                                                                                                                                                                                                     |
| Network Relationships Inventory, Child                | X | Furman, W., & Buhrmester, D. (2010). Network of relationships questionnaire manual. Unpublished manual./ Furman, W., & Buhrmester, D. (1985). Children's perceptions of the personal relationships in their social networks. <i>Developmental psychology</i> , 21(6), 1016-1024.                                                                                                                                                                                        |
| Prinstein Peer Evaluation Questionnaire, Child        | X | Prinstein, M. J., Boergers, J., & Vernberg, E. M. (2001). Overt and relational aggression in adolescents: Social-psychological adjustment of aggressors and victims. <i>Journal of clinical child psychology</i> , 30(4), 479-491.                                                                                                                                                                                                                                      |
| Friendship competence questionnaire, Child            | X | Vennum, A., & Fincham, F. D. (2011). Assessing decision making in young adult romantic relationships. <i>Psychological Assessment</i> , 23(3), 739-751.                                                                                                                                                                                                                                                                                                                 |
| Romantic relationship activities, Child               | X | Starr, L. R., & Davila, J. (2009). Clarifying co-rumination: Associations with internalizing symptoms and romantic involvement among adolescent girls. <i>Journal of Adolescence</i> , 32(1), 19–37./ Steinberg, S. J., Davila, J., & Fincham, F. (2006). Adolescent marital expectations and romantic experiences: Associations with perceptions about parental conflict and adolescent attachment security. <i>Journal of Youth and Adolescence</i> , 35(3), 333-348. |
| UCLA Loneliness, Child                                | X | Roberts, R. E., Lewinsohn, P. M., & Seeley, J. R. (1993). A brief measure of loneliness suitable for use with adolescents. <i>Psychological Reports</i> , 72(3_suppl), 1379-1391.                                                                                                                                                                                                                                                                                       |
| Children’s Rejection Sensitivity Questionnaire, Child | X | Downey, G., Lebolt, A., Rincón, C., & Freitas, A. L. (1998). Rejection sensitivity and children's interpersonal difficulties. <i>Child Development</i> , 69(4), 1074-1091./ Araiza, A.M., Freitas, A.L., & Klein, D.N. (in press). Temperamental and social- experience predictors of rejection sensitivity: A prospective study. <i>Social Psychological and Personality Science</i> .                                                                                 |

**Child Electrophysiology**

- ERN (flanker) X Gehring, W. J., Goss, B., Coles, M. G., Meyer, D. E., & Donchin, E. (1993). A neural system for error detection and compensation. *Psychological Science*, 4(6), 385-390. / Hajcak, G. (2012). What we've learned from mistakes: Insights from error-related brain activity. *Current Directions in Psychological Science*, 21(2), 101-106. / Meyer, A., Hajcak, G., Glenn, C.R., Kujawa, A.J., & Klein, D.N. (2017). Error-related brain activity is related to aversive potentiation of the startle response in children. *Emotion*, 17, 487-496. / Meyer, A., Hajcak, G., Torpey-Newman, D., Kujawa, A., Olino, T.M., Dyson, M., & Klein, D.N. (2018). Early temperamental fearfulness and the developmental trajectory of error-related brain activity. *Developmental Psychobiology*, 60, 224-231.
- LPP (IAPS pictures- emotion interrupt) X Cuthbert, B.N., Schupp, H.T., Bradley, M.M., Birbaumer, N., & Lang, P.J. (2000). Brain potentials in affective picture processing: Covariation with autonomic arousal and affective report. *Biological Psychology*, 52, 95-111. / Kujawa, A., Hajcak, G., Danzig, A.P., Black, S.R., Bromet, E.J., Carlson, G.A., Kotov, R., & Klein, D. N. (2016). Neural reactivity to emotional stimuli prospectively predicts the impact of a natural disaster on psychiatric symptoms in children. *Biological Psychiatry*, 80, 381-389. / Pegg, S.L., Dickey, L.I., Mumper, E., Kessel, E., Klein, D.N., & Kujawa, A. (in press). Stability and change in emotional processing across development: A 6-year longitudinal investigation using event-related potentials. *Psychophysiology*.

FN/RewP (doors) X Holroyd, C.B., & Coles, M.G.H. (2002). The neural basis of human error processing: Reinforcement learning, dopamine, and the error-related negativity. *Psychological Review*, 109, 679–709. / Proudfit GH (2015): The reward positivity: From basic research on reward to a biomarker for depression. *Psychophysiology*, 52, 449–459. /Kujawa, A.J., Proudfit, G.H., & Klein, D.N. (2014). Neural reactivity to reward in offspring of mothers and fathers with histories of depressive and anxiety disorders. *Journal of Abnormal Psychology*, 123, 287-297. / Kujawa, A., Carroll, A., Mukherjee, D., Mumper, E., Kessel, E., Olino, T., Hajcak, G., & Klein, D.N. (2018). A longitudinal examination of event-related potentials sensitive to monetary reward and loss feedback from late childhood to middle adolescence. *International Journal of Psychophysiology*, 132, 323-330. / Kujawa, A., Hajcak, G., & Klein, D.N. (2019). Reduced reward responsiveness moderates the effect of maternal depression on depressive symptoms in offspring: Evidence across levels of analysis. *Journal of Child Psychology and Psychiatry*, 60, 82-90.

Island Getaway X Kujawa, A.J., Arfer, K.G., Klein, D.N., & Proudfit, G.H. (2014). Island Getaway: A novel measure of electrocortical reactivity to social feedback in youth. *Developmental Cognitive Neuroscience*, 10, 140-147. / Kujawa, J., Kessel, E., Carroll, A., Arfer, K., & Klein, D.N. (2017). Social processing in early adolescence: Associations between neurophysiological, self-report, and behavioral measures. *Biological Psychology*, 128, 55-62.

Island Getaway Questionnaire X Van Beest, I., & Williams, K.D. (2006). When inclusion costs and ostracism pays, ostracism still hurts. *Journal of Personality and Social Psychology*, 91, 918–928. / Kujawa, A.J., Arfer, K.G., Klein, D.N., & Proudfit, G.H. (2014). Island Getaway: A novel measure of electrocortical reactivity to social feedback in youth. *Developmental Cognitive Neuroscience*, 10, 140-147

**Parent Psychopathology**

|                                                        |   |   |                                                                                                                                                                                                                                                                                                                                                                     |
|--------------------------------------------------------|---|---|---------------------------------------------------------------------------------------------------------------------------------------------------------------------------------------------------------------------------------------------------------------------------------------------------------------------------------------------------------------------|
| SCID and, at age 3, selected SCID-II disorders, Mother | X |   | First, M. B., Gibbon, M., Spitzer, R. L., & Williams, J. B. W. (1996). Structured clinical interview for DSM- IV Axis I disorders: Non-patient edition (SCID-I, Version 2.0)/ Williams, J.B.W., et al. (1992). The Structured Clinical Interview for DSM-III-R (SCID): II. Multisite test-retest reliability. <i>Archives of General Psychiatry</i> , 49, 630-636./ |
| SCID and, at age 3, selected SCID-II disorders, Father | X |   |                                                                                                                                                                                                                                                                                                                                                                     |
| Family history RDC interview, Mother                   | X |   | Andreasen, N. C., Endicott, J., Spitzer, R. L., & Winokur, G. (1977). The family history method using diagnostic criteria. <i>Archives of General Psychiatry</i> , 43, 1229-1235.                                                                                                                                                                                   |
| Family history RDC interview , Father                  | X |   |                                                                                                                                                                                                                                                                                                                                                                     |
| MINI (MDE and Dysthymia), One parent                   |   | X |                                                                                                                                                                                                                                                                                                                                                                     |
| DID; Diagnostic Inventory for Depression, Mother       | X | X | Zimmerman, M., Sheeran, T., & Young, D. (2004). The Diagnostic Inventory for Depression: a self-report scale to diagnose DSM-IV major depressive disorder. <i>Journal of Clinical Psychology</i> , 60(1), 87-110.                                                                                                                                                   |
| DID; Diagnostic Inventory for Depression, Father       | X | X |                                                                                                                                                                                                                                                                                                                                                                     |
| Social Interaction Anxiety, Mother                     | X |   | Mattick, R. P., & Clarke, J. C. (1998). Development and validation of measures of social phobia scrutiny fear and social interaction anxiety. <i>Behavior Research and Therapy</i> , 36 , 455–470.                                                                                                                                                                  |
| Social Interaction Anxiety, Father                     | X |   |                                                                                                                                                                                                                                                                                                                                                                     |
| Beck Anxiety Inventory, Mother                         |   | X | Beck, A. T., Epstein, N., Brown, G., & Steer, R. A. (1988). An inventory for measuring clinical anxiety: Psychometric properties. <i>Journal of Consulting and Clinical Psychology</i> , 56(6), 893-897.                                                                                                                                                            |
| Beck Anxiety Inventory, Father                         |   | X |                                                                                                                                                                                                                                                                                                                                                                     |
| Penn State Worry Questionnaire, Mother                 |   | X | Meyer, T. J., Miller, M. L., Metzger, R. L., & Borkovec, T. D. (1990). Development and validation of the penn state worry questionnaire. <i>Behaviour research and therapy</i> , 28(6), 487-495.                                                                                                                                                                    |
| Penn State Worry Questionnaire, Father                 |   | X |                                                                                                                                                                                                                                                                                                                                                                     |
| Brief Fear of Negative Evaluation Scale, Mother        |   | X | Leary, M. R. (1983). A brief version of the Fear of Negative Evaluation Scale. <i>Personality and Social Psychology Bulletin</i> , 9(3), 371-375.                                                                                                                                                                                                                   |
| Brief Fear of Negative Evaluation Scale, Father        |   | X |                                                                                                                                                                                                                                                                                                                                                                     |

**Parenting**

|                                                       |   |                                                                                                                                                                                                                                                                                                                                                                                                                                                                                                                                                                                                                                                                                                         |
|-------------------------------------------------------|---|---------------------------------------------------------------------------------------------------------------------------------------------------------------------------------------------------------------------------------------------------------------------------------------------------------------------------------------------------------------------------------------------------------------------------------------------------------------------------------------------------------------------------------------------------------------------------------------------------------------------------------------------------------------------------------------------------------|
| Teaching Tasks (observed parenting)                   | X | Egeland, B., Weinfield, N., Hiester, M., Lawrence, C., Pierce, S., & Sessa, F. M., Avenevoli, S., Steinberg, L., & Morris, A. S. (2001). Correspondence among informants on parenting: Preschool children, mothers, and observers. <i>Journal of Family Psychology, 15</i> (1), 53-68.                                                                                                                                                                                                                                                                                                                                                                                                                  |
| Preschool Parenting Measure, Mother                   | X |                                                                                                                                                                                                                                                                                                                                                                                                                                                                                                                                                                                                                                                                                                         |
| Preschool Parenting Measure, Father                   | X |                                                                                                                                                                                                                                                                                                                                                                                                                                                                                                                                                                                                                                                                                                         |
|                                                       |   | Robinson, C. C., Mandleco, B., Olsen, S. F., & Hart, C. H. (1995). Authoritative, authoritarian, and permissive parenting practices: Development of a new measure. <i>Psychological Reports, 77</i> , 819-839./ Robinson, C. C., Mandleco, B. Olsen, S. F., & Hart, C. H. (2001). The Parenting Styles and Dimensions Questionnaire (PSDQ). In B.F. Perlmutter, J. Touliatos, & G.W. Holden (Eds.) <i>Handbook of Family Measurement Techniques: Vol. 3. Instruments &amp; Index</i> (pp.319-321)./ Olivari, M. G., Tagliabue, S., & Confalonieri, E. (2013). Parenting Style and Dimensions Questionnaire: A review of reliability and validity. <i>Marriage &amp; Family Review, 49</i> (6), 465-490. |
| Parenting Styles and Dimensions Questionnaire, Child  | X |                                                                                                                                                                                                                                                                                                                                                                                                                                                                                                                                                                                                                                                                                                         |
| Parenting Styles and Dimensions Questionnaire, Mother | X |                                                                                                                                                                                                                                                                                                                                                                                                                                                                                                                                                                                                                                                                                                         |
| Parenting Styles and Dimensions Questionnaire, Father | X |                                                                                                                                                                                                                                                                                                                                                                                                                                                                                                                                                                                                                                                                                                         |
|                                                       |   | Schludermann, E., & Schludermann, S. (1970). Replicability of factors in children's report of parent behavior (CRPBI). <i>The Journal of Psychology, 76</i> (2), 239-249./ Margolies, P. J., & Weintraub, S. (1977). The revised 56-item CRPBI as a research instrument: Reliability and factor structure. <i>Journal of Clinical Psychology, 33</i> (2), 472-476. /Schwarz, J. C., Barton-Henry, M. L., & Pruzinsky, T. (1985). Assessing child-rearing behaviors: A comparison of ratings made by mother, father, child, and sibling on the CRPBI. <i>Child development, 462-479</i> .                                                                                                                |
| CRPBI, Mother                                         | X |                                                                                                                                                                                                                                                                                                                                                                                                                                                                                                                                                                                                                                                                                                         |
| CRPBI, Father                                         | X |                                                                                                                                                                                                                                                                                                                                                                                                                                                                                                                                                                                                                                                                                                         |
